# Supplementary material for: Pathway Analysis of Selected Circulating miRNAs in Plasma of Breast Cancer Patients: A Preliminary Study
Source: PubMed Central journal article supplement (PMC7583045; doi:10.3390/ijms21197288), 2020-10-02
Supplement: ijms-21-07288-s001.pdf [file ijms-21-07288-s001.pdf]

## Supplementary Data

### 1. miRNA Expression Correlation to Histopathological Parameters

The causality of all miRNAs and histopathological parameters was tested by robust ANOVA and findings with the  $p < 0.05$  were considered statistically significant. The summary of the ANOVA data analysis is listed in Table 1. The significant association was found between histology and miR-130a ( $p = 0.005$ ) and tumor size and miR-99a ( $p = 0.047$ ).

**Table S1.** Data analysis of circulating miRNA expression in the plasma of cancer patients, compared to control group according to histopathological parameters, the  $p$ -values were obtained in the Robust ANOVA method. The significant and weakly significant values are marked with asterisks.

| miRNA ID    | Histology | Subtype | Grade | ER Status | PR Status | HER2   | Tumor Size | Nodal Status | LVI   | PNI   | ki67  |
|-------------|-----------|---------|-------|-----------|-----------|--------|------------|--------------|-------|-------|-------|
| miR-10b-5p  | 0.294     | 0.5     | 0.973 | 0.75      | 0.065*    | 0.911  | 0.17       | 0.743        | 0.561 | 0.127 | 0.901 |
| miR-99a-5p  | 0.416     | 0.388   | 0.499 | 0.75      | 0.45      | 0.639  | 0.047*     | 0.728        | 0.506 | 0.782 | 0.319 |
| miR-130a-3p | 0.005*    | 0.277   | 0.711 | 0.606     | 0.43      | 0.961  | 0.749      | 0.92         | 0.142 | 0.554 | 0.971 |
| miR-144-3p  | 0.815     | 0.855   | 0.78  | 0.589     | 0.823     | 0.971  | 0.457      | 0.395        | 0.352 | 0.353 | 0.503 |
| miR-342-3p  | 0.655     | 0.39    | 0.398 | 0.777     | 0.323     | 0.088* | 0.691      | 0.743        | 0.635 | 0.705 | 0.31  |
| miR-451     | 0.812     | 0.583   | 0.944 | 0.84      | 0.897     | 0.591  | 0.414      | 0.817        | 0.861 | 0.539 | 0.807 |
| miR-484     | 0.442     | 0.819   | 0.519 | 0.695     | 0.262     | 0.757  | 0.301      | 0.591        | 0.315 | 0.582 | 0.904 |
| miR-486-5p  | 0.654     | 0.583   | 0.711 | 0.623     | 0.256     | 0.388  | 0.215      | 0.085*       | 0.546 | 0.863 | 0.518 |
| miR-1260a   | 0.771     | 0.382   | 0.94  | 0.952     | 0.655     | 0.983  | 0.482      | 0.806        | 0.298 | 0.49  | 0.614 |

MicroRNA-99a was significantly associated with tumor size ( $p = 0.047$ ). However, the main difference is between tumor in situ (TIS) and tumor size less than 20 mm. In the group of TIS, there is a small samples size ( $n = 4$ ) and the results are not representative (Figure 1). MicroRNA-130a was found significantly associated with histology type ( $p = 0.005$ ). After detailed observation of the dotplot, the main difference is between invasive lobular carcinoma (ILC) and invasive carcinoma—no specific type (IC NST) that can be hardly specified (Figure 1).
